# Supplementary material for: True prevalence of long-COVID in a nationwide, population cohort study
Source: PubMed Central journal article supplement (PMC10689486; doi:10.1038/s41467-023-43661-w), 2023-11-30
Supplement: 41467_2023_43661_MOESM1_ESM.pdf [file 41467_2023_43661_MOESM1_ESM.pdf]

**Supplementary Figure 1. Self-completed Questionnaire**

Q1. Have you ever had a positive Covid-19 test? (yes/no)

Q2. Have you had a Covid-19 vaccine? (yes/no)

Q3. What Covid-19 symptoms did you have? [only if Q1 yes] (select all that apply)

Fever; Cough; Change in taste; Change in smell; Tiredness (fatigue); Headache; Ear pain; Runny nose; Muscle aches or weakness; Joint pain; Breathlessness; Chest pain; Sore throat; Hoarse voice; Loss of appetite; Stomach (abdominal) pain; Diarrhoea; Confusion; Seizures; Hair loss; Unconscious/semi-conscious; I didn't have any symptoms [go to Q5]

Q4. How long did your symptoms last?

Less than 1 week; 1-4 weeks; More than 4 weeks

Q5. How do you feel now?

Fully recovered; Partly recovered; Not recovered

Q6. Before your Covid-19 test, did you have any health issues or medical conditions?

Yes; No [go to Q8]

Q7. Which health issues or medical conditions did you have? (select all that apply)

Arthritis; Asthma/bronchitis/COPD; Cancer; Cystic fibrosis; Deep vein thrombosis; Depression/anxiety; Diabetes; Heart disease; Heart failure; High blood pressure; HIV; Home oxygen; Kidney disease; Liver disease; Neurological condition; Overweight; Obese; Pulmonary embolism; Pulmonary fibrosis; Stroke; I didn't have any of these [go to Q8]

Q8. Have you experienced any of the following in the last week? (select all that apply)

Dry cough; Cough with phlegm; Change in taste; Change in smell; Problems hearing; Problems with eyesight; Tired; Headache; Muscle aches/weakness; Pins and needles; Joint pain; Breathless; Chest pain; Palpitations; Poor appetite; Stomach (abdominal) pain; Feeling sick/vomiting; Diarrhoea; Constipation; Weight loss; Anxious/depressed; Confusion/difficulty concentrating; Dizzy/blackouts/fits; Balance problems; Skin rash; Problems sleeping; I haven't experienced any of these [go to Q10]

Q9. Are any of these new or worse since your Covid-19 test? (select all that apply)

Response list from Q8; None of these are new or worse [go to Q10]

Q10. Is your current health causing you difficulty with any of the following? Select all that apply.

Walking/getting around; Housework/DIY/chores; Working/studying; Washing/dressing; Exercise/sports; Hobbies; Relationships; None of these apply [go to Q12; if also no to Q2 go to Q13]

Q11. Which of the difficulties you're experiencing are new/worse since having your Covid-19 test? (select all that apply)

Response list from Q10; None of these are new or worse [go to Q13]

Q12. Has your job changed since your Covid-19 test?

No change; Different due to my Covid-19 illness; Different for other reasons; None of these apply

Q13. What is your ethnicity?

White Scottish; White Other British; White Irish; White Gypsy/Traveller; White Polish; Other white ethnic group; Mixed or multiple ethnic groups; Pakistani, Pakistani Scottish or Pakistani British; Indian, Indian Scottish or Indian British; Bangladeshi, Bangladeshi Scottish or Bangladeshi British; Chinese, Chinese Scottish or Chinese British; Other Asian, Asian Scottish or Asian British; African, African Scottish or African British; Other African; Caribbean, Caribbean Scottish or Caribbean British; Black, Black Scottish or Black British; Other Caribbean or Black; Arab, Arab Scottish or Arab British; Other ethnic group; Prefer not to say

Q14. How would you rate your health today?

EQ-5D thermometer (0 Worst health I can imagine – 100 Best health I can imagine)

**Supplementary Table 1. Crude and adjusted attributable prevalence of long-COVID at 6, 12 and 18 months following symptomatic SARS-CoV-2 infection**

|                                                 | 6 months       |            |                                        |                                            | 12 months      |            |                                        |                                            | 18 months      |            |                                        |                                            |
|-------------------------------------------------|----------------|------------|----------------------------------------|--------------------------------------------|----------------|------------|----------------------------------------|--------------------------------------------|----------------|------------|----------------------------------------|--------------------------------------------|
|                                                 | Never infected | Infected   |                                        |                                            | Never infected | Infected   |                                        |                                            | Never infected | Infected   |                                        |                                            |
|                                                 | Prevalence     | Prevalence | Crude attributable prevalence (95% CI) | Adjusted* attributable prevalence (95% CI) | Prevalence     | Prevalence | Crude attributable prevalence (95% CI) | Adjusted* attributable prevalence (95% CI) | Prevalence     | Prevalence | Crude attributable prevalence (95% CI) | Adjusted* attributable prevalence (95% CI) |
| <b>Overall</b>                                  | 50.8           | 64.5       | 13.8 (13.2,14.3)                       | 6.6 (6.3, 6.9)                             | 55.0           | 67.8       | 12.8 (11.9,13.6)                       | 6.5 (6.0, 6.9)                             | 56.2           | 72.5       | 16.3 (14.4,18.2)                       | 10.4 (9.1, 11.6)                           |
| <b>Age group (years)</b>                        |                |            |                                        |                                            |                |            |                                        |                                            |                |            |                                        |                                            |
| 16-29                                           | 52.5           | 64.9       | 12.4 (11.2,13.5)                       | 5.1 (4.5, 5.7)                             | 56.2           | 65.9       | 9.7 (7.6,11.8)                         | 4.1 (3.0, 5.2)                             | 56.9           | 69.0       | 12.1 (6.8,17.5)                        | 5.6 (2.0, 9.2)                             |
| 30-39                                           | 52.4           | 65.8       | 13.4 (12.1,14.7)                       | 6.5 (5.8, 7.2)                             | 56.1           | 68.2       | 12.1 (9.9,14.3)                        | 6.4 (5.3, 7.6)                             | 56.4           | 71.5       | 15.2 (9.8,20.5)                        | 11.0 (6.9, 15.1)                           |
| 40-49                                           | 51.5           | 64.9       | 13.5 (12.2,14.7)                       | 7.5 (6.9, 8.2)                             | 57.2           | 70.2       | 13.0 (11.1,15.0)                       | 8.0 (6.8, 9.1)                             | 58.2           | 74.2       | 16.0 (11.5,20.5)                       | 12.0 (8.7, 15.4)                           |
| 50-59                                           | 49.0           | 65.8       | 16.8 (15.7,17.9)                       | 8.1 (7.5, 8.7)                             | 54.8           | 69.2       | 14.4 (12.8,16.1)                       | 7.5 (6.7, 8.4)                             | 55.7           | 73.7       | 17.9 (14.5,21.4)                       | 13.1 (10.8, 15.4)                          |
| 60-69                                           | 48.4           | 61.5       | 13.1 (11.7,14.5)                       | 6.6 (5.9, 7.2)                             | 52.0           | 65.9       | 14.0 (12.0,16.0)                       | 6.4 (5.4, 7.3)                             | 55.6           | 73.0       | 17.4 (13.3,21.5)                       | 8.9 (6.4, 11.4)                            |
| 70+                                             | 51.0           | 60.2       | 9.2 (7.1,11.4)                         | 3.3 (2.2, 4.3)                             | 54.2           | 63.9       | 9.7 (6.3,13.0)                         | 3.6 (2.1, 5.2)                             | 54.8           | 70.0       | 15.1 (7.3,23.0)                        | 6.0 (2.1, 10.0)                            |
| <b>Sex</b>                                      |                |            |                                        |                                            |                |            |                                        |                                            |                |            |                                        |                                            |
| Female                                          | 54.4           | 68.5       | 14.1 (13.4,14.8)                       | 7.4 (7.1, 7.8)                             | 59.0           | 71.5       | 12.5 (11.4,13.6)                       | 7.0 (6.4, 7.6)                             | 59.9           | 75.5       | 15.5 (13.1,18.0)                       | 11.2 (9.4, 12.9)                           |
| Male                                            | 46.1           | 58.2       | 12.1 (11.3,13.0)                       | 5.5 (5.1, 5.9)                             | 49.9           | 62.0       | 12.1 (10.8,13.5)                       | 5.7 (5.1, 6.4)                             | 51.5           | 67.9       | 16.4 (13.5,19.4)                       | 9.5 (7.6, 11.4)                            |
| <b>SIMD</b>                                     |                |            |                                        |                                            |                |            |                                        |                                            |                |            |                                        |                                            |
| 1 (most deprived)                               | 55.7           | 69.8       | 14.0 (12.9,15.2)                       | 6.2 (5.6, 6.8)                             | 60.4           | 72.3       | 11.9 (10.1,13.6)                       | 5.6 (4.7, 6.5)                             | 61.4           | 77.8       | 16.4 (12.6,20.2)                       | 10.0 (7.4, 12.5)                           |
| 2                                               | 52.9           | 67.2       | 14.3 (13.2,15.5)                       | 6.7 (6.1, 7.3)                             | 57.2           | 71.0       | 13.8 (11.9,15.6)                       | 7.3 (6.4, 8.3)                             | 58.2           | 75.5       | 17.3 (13.1,21.4)                       | 11.6 (8.7, 14.5)                           |
| 3                                               | 50.6           | 64.9       | 14.3 (13.1,15.5)                       | 7.1 (6.5, 7.8)                             | 55.2           | 68.2       | 13.0 (11.1,15.0)                       | 6.6 (5.6, 7.7)                             | 55.9           | 72.0       | 16.0 (11.7,20.4)                       | 10.8 (8.0, 13.7)                           |
| 4                                               | 48.5           | 62.1       | 13.6 (12.4,14.7)                       | 6.8 (6.2, 7.5)                             | 51.5           | 65.7       | 14.2 (12.3,16.1)                       | 7.0 (6.0, 8.0)                             | 54.6           | 69.7       | 15.1 (10.7,19.5)                       | 9.6 (6.6, 12.7)                            |
| 5 (least deprived)                              | 45.9           | 59.1       | 13.2 (12.0,14.4)                       | 6.2 (5.5, 6.8)                             | 50.2           | 61.8       | 11.6 (9.7,13.5)                        | 5.8 (4.8, 6.9)                             | 49.7           | 65.7       | 16.0 (11.5,20.5)                       | 10.0 (6.9, 13.0)                           |
| <b>Number of pre-existing health conditions</b> |                |            |                                        |                                            |                |            |                                        |                                            |                |            |                                        |                                            |
| 0                                               | 42.2           | 58.9       | 16.6 (16.0,17.3)                       | 7.7 (7.4, 8.1)                             | 45.0           | 62.6       | 17.6 (16.6,18.7)                       | 8.2 (7.6, 8.7)                             | 43.6           | 66.7       | 23.1 (20.6,25.5)                       | 14.0 (12.2, 15.8)                          |
| 1                                               | 61.7           | 73.3       | 11.6 (10.3,12.9)                       | 5.3 (4.6, 6.1)                             | 65.5           | 73.9       | 8.4 (6.3,10.5)                         | 4.2 (3.0, 5.3)                             | 66.8           | 78.0       | 11.2 (6.6,15.8)                        | 5.0 (2.1, 7.8)                             |
| 2-3                                             | 74.9           | 81.7       | 6.8 (5.5,8.0)                          | 3.3 (2.6, 3.9)                             | 78.4           | 83.3       | 5.0 (3.2,6.7)                          | 2.6 (1.7, 3.5)                             | 78.1           | 88.3       | 10.2 (6.5,13.8)                        | 5.3 (3.0, 7.7)                             |
| 4                                               | 84.5           | 88.6       | 4.1 (2.1,6.2)                          | 1.7 (0.8, 2.7)                             | 86.5           | 89.4       | 2.9 (0.0,5.8)                          | 1.7 (0.3, 3.1)                             | 87.9           | 93.9       | 6.0 (0.9,11.1)                         | 1.4 (-1.2, 3.9)                            |
| <b>Ethnic group</b>                             |                |            |                                        |                                            |                |            |                                        |                                            |                |            |                                        |                                            |
| White                                           | 52.7           | 65.5       | 12.8 (12.2,13.3)                       | 6.8 (6.5, 7.1)                             | 57.1           | 69.1       | 12.0 (11.1,12.8)                       | 6.6 (6.2, 7.1)                             | 58.2           | 73.9       | 15.7 (13.7,17.6)                       | 10.4 (9.0, 11.7)                           |
| South Asian                                     | 43.0           | 58.2       | 15.2 (10.9,19.5)                       | 6.4 (4.3, 8.6)                             | 45.3           | 60.7       | 15.3 (8.2,22.5)                        | 6.3 (2.8, 9.8)                             | 45.3           | 63.0       | 17.7 (1.9,33.5)                        | 14.1 (1.3, 26.8)                           |
| Black                                           | 39.7           | 58.7       | 19.0 (12.0,26.0)                       | 8.5 (4.9, 12.0)                            | 42.9           | 53.6       | 10.7 (-0.7,22.0)                       | 3.0 (-1.8, 7.8)                            | 69.6           | 59.5       | -10.1 (-34.7,14.5)                     | -12.9 (-30.6, 4.8)                         |
| Other                                           | 48.2           | 63.2       | 15.0 (11.3,18.7)                       | 6.4 (4.6, 8.1)                             | 49.5           | 62.9       | 13.4 (6.7,20.0)                        | 6.5 (3.5, 9.5)                             | 53.9           | 72.9       | 19.0 (5.3,32.6)                        | 10.8 (3.3, 18.3)                           |
| Missing                                         | 28.7           | 42.5       | 13.8 (11.3,16.3)                       | 4.0 (3.1, 4.8)                             | 31.2           | 42.8       | 11.7 (7.7,15.6)                        | 3.8 (2.3, 5.2)                             | 29.2           | 47.4       | 18.2 (9.7,26.6)                        | 9.7 (5.2, 14.1)                            |
| <b>Number of vaccination doses</b>              |                |            |                                        |                                            |                |            |                                        |                                            |                |            |                                        |                                            |
| 0                                               | 51.0           | 64.2       | 13.2 (12.4,14.0)                       | 5.1 (4.8, 5.4)                             | 56.0           | 67.9       | 11.9 (10.8,13.0)                       | 4.7 (4.3, 5.1)                             | 56.2           | 72.5       | 16.3 (14.3,18.2)                       | 10.3 (9.0, 11.6)                           |
| 1                                               | 52.3           | 66.0       | 13.8 (11.7,15.9)                       | 6.5 (5.5, 7.6)                             | 55.2           | 68.9       | 13.7 (10.4,17.1)                       | 9.5 (7.2, 11.8)                            | 56.4           | 72.3       | 15.9 (5.7,26.0)                        | 11.0 (3.4, 18.5)                           |
| 2                                               | 49.5           | 66.8       | 17.4 (16.4,18.4)                       | 7.4 (6.9, 8.0)                             | 50.1           | 67.6       | 17.4 (15.6,19.2)                       | 10.5 (9.2, 11.8)                           | 51.9           | 84.0       | 32.1 (8.4,55.8)                        | 2.8 (-8.7, 14.2)                           |
| 3                                               | 51.9           | 62.6       | 10.7 (9.4,12.1)                        | 7.2 (6.2, 8.2)                             | 52.3           | 68.1       | 15.7 (7.9,23.6)                        | 6.7 (2.5, 10.8)                            | -              | -          | -                                      | -                                          |
| <b>Variant period</b>                           |                |            |                                        |                                            |                |            |                                        |                                            |                |            |                                        |                                            |
| Pre VOC                                         | 50.8           | 65.2       | 14.4 (13.1,15.8)                       | 4.8 (4.4, 5.3)                             | 56.8           | 69.8       | 13.0 (11.3,14.8)                       | 4.3 (3.7, 4.9)                             | 56.1           | 73.3       | 17.2 (14.5,19.9)                       | 7.6 (6.4, 8.7)                             |

|                 |      |      |                  |                 |      |      |                  |                  |      |      |                  |                  |
|-----------------|------|------|------------------|-----------------|------|------|------------------|------------------|------|------|------------------|------------------|
| No dominant (1) | 51.6 | 65.5 | 13.9 (12.6,15.2) | 4.1 (3.7, 4.5)  | 55.8 | 68.6 | 12.7 (11.1,14.3) | 4.1 (3.6, 4.6)   | 57.0 | 72.7 | 15.7 (12.1,19.3) | 12.8 (9.9, 15.6) |
| Alpha           | 53.1 | 66.8 | 13.7 (11.2,16.2) | 3.9 (3.2, 4.6)  | 56.0 | 69.8 | 13.8 (10.1,17.6) | 4.0 (3.0, 5.1)   | 56.2 | 71.6 | 15.5 (9.0,21.9)  | 9.5 (4.7, 14.4)  |
| No dominant (2) | 52.4 | 64.1 | 11.7 (8.5,15.0)  | 3.7 (2.6, 4.9)  | 50.3 | 69.5 | 19.3 (13.9,24.6) | 9.9 (7.0, 12.8)  | 51.7 | 67.9 | 16.2 (4.3,28.1)  | 13.7 (4.8, 22.7) |
| Delta           | 49.1 | 66.7 | 17.6 (16.6,18.6) | 6.7 (6.2, 7.1)  | 50.1 | 66.8 | 16.6 (15.0,18.3) | 10.4 (9.2, 11.6) | -    | -    | -                | -                |
| No dominant (3) | 48.8 | 62.2 | 13.4 (11.5,15.3) | 8.9 (7.5, 10.2) | 52.6 | 66.7 | 14.1 (0.6,27.6)  | 7.0 (-2.5, 16.5) | -    | -    | -                | -                |
| Omicron         | 52.6 | 63.3 | 10.7 (9.2,12.1)  | 7.9 (6.9, 9.0)  | -    | -    | -                | -                | -    | -    | -                | -                |

CI confidence interval; SIMD Scottish Index of Multiple Deprivation; VOC Variant of concern

\*Adjusted for age, sex, ethnic group, SIMD quintile, number of pre-existing health conditions, asthma/bronchitis/COPD, CHD, depression/anxiety, diabetes, variant period, Covid-19 severity (hospitalised yes/no), and number of vaccination doses.
